# Supplementary material for: Novel Variants of Streptococcus thermophilus Bacteriophages Are Indicative of Genetic Recombination among Phages from Different Bacterial Species
Source: PubMed Central journal article supplement (PMC5311409; doi:10.1128/aem.02748-16), 2017-02-15
Supplement: AEM.02748-16_zam999117703s1.pdf [file AEM.02748-16_zam999117703s1.pdf]

# 1 Supplemental material

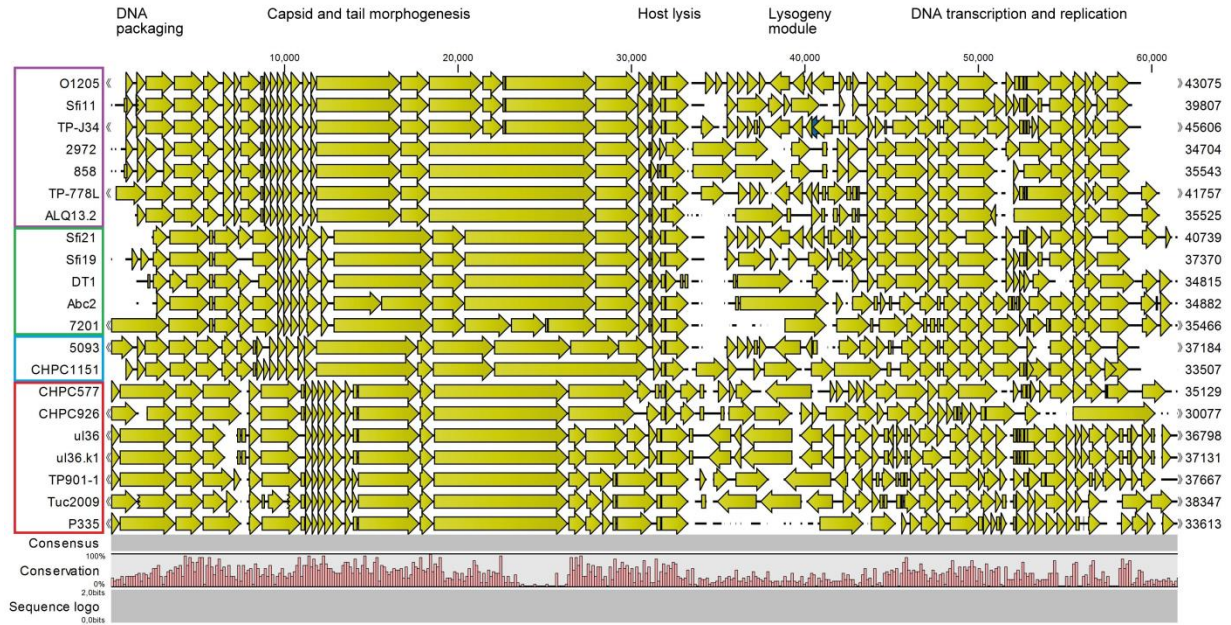

2

3 FIG S1 Multiple genome alignment of phages CHPC577, CHPC926, CHPC1151 with the *S.*  
4 *thermophilus* phages and the subgroup II *L. lactis* P335 phages available in the NCBI database,  
5 based on nucleotide sequences. Sequences are sorted by similarity. Four recognized homology  
6 clusters are marked in different colors.

7 TABLE S1 List of ORFs from phages CHPC577, CHPC926, and CHPC1151 holding start  
8 codons sequences different from ATG.

| <b>Phage</b> | <b>ORF no.</b>  | <b>Starting codon</b> |
|--------------|-----------------|-----------------------|
| CHPC577      | 3, 7, 9, 38, 47 | TTG                   |
| CHPC926      | 3, 7, 9         | TTG                   |
|              | 1, 17           | GTG                   |
| CHPC1151     | 2, 44           | TTG                   |
|              | 4, 42, 45       | GTG                   |

9

10

11 TABLE S2 Features and putative functions of ORFs annotated for phage CHPC577.

| ORF               | Size<br>[aa] | Mol<br>mass<br>[kDa] | pI          | Putative function                  | Highest identity                        | Identity [%] | Accession no. |
|-------------------|--------------|----------------------|-------------|------------------------------------|-----------------------------------------|--------------|---------------|
|                   |              |                      |             | RASTtk                             | tBLASTn                                 | tBLASTn      | tBLASTn       |
| CHPC577_01        | 138          | 15.41                | 9.56        | hypothetical protein               | <i>L. lactis</i> subsp. cremoris NZ9000 | 73           | CP002094      |
| CHPC577_02        | 463          | 53.16                | 7.20        | terminase, large subunit           | <i>L. lactis</i> phage ul36.k1          | 98           | DQ394806      |
| <b>CHPC577_03</b> | <b>447</b>   | <b>51.54</b>         | <b>4.41</b> | <b>portal protein</b>              | <i>L. lactis</i> phage ul36.k1          | 93           | DQ394806      |
| CHPC577_04        | 347          | 39.80                | 9.29        | minor capsid protein               | <i>L. lactis</i> phage Tuc2009          | 95           | AF109874      |
| <b>CHPC577_05</b> | <b>200</b>   | <b>22.21</b>         | <b>4.64</b> | <b>capsid and scaffold protein</b> | <i>L. lactis</i> phage TP901-1          | 96           | X84706        |
| <b>CHPC577_06</b> | <b>288</b>   | <b>31.33</b>         | <b>5.83</b> | <b>major capsid protein</b>        | <i>L. lactis</i> phage ul36             | 93           | AF349457      |
| <b>CHPC577_07</b> | <b>64</b>    | <b>6.38</b>          | <b>4.71</b> | <b>major tail protein</b>          | <i>L. lactis</i> phage ul36             | 96           | AF349457      |
| CHPC577_08        | 111          | 12.92                | 4.61        | hypothetical protein               | <i>L. lactis</i> subsp. cremoris SK11   | 98           | CP000425      |
| CHPC577_09        | 104          | 12.15                | 4.56        | hypothetical protein               | <i>L. lactis</i> subsp. lactis CV56     | 97           | CP002365      |
| CHPC577_10        | 109          | 11.95                | 10.34       | capsid and scaffold protein        | <i>L. lactis</i> phage Tuc2009          | 97           | AF109874      |
| CHPC577_11        | 130          | 14.79                | 6.53        | capsid and scaffold protein        | <i>L. lactis</i> phage Tuc2009          | 95           | AF109874      |
| CHPC577_12        | 166          | 18.26                | 4.57        | tail protein                       | <i>L. lactis</i> phage ul36             | 98           | AF349457      |
| CHPC577_13        | 117          | 13.46                | 4.70        | hypothetical protein               | <i>L. lactis</i> phage P335             | 97           | DQ838728      |
| CHPC577_14        | 90           | 10.67                | 10.27       | hypothetical protein               | <i>L. lactis</i> phage P335             | 99           | DQ838728      |
| CHPC577_15        | 917          | 99.20                | 9.88        | tape-measure protein               | <i>L. lactis</i> subsp. cremoris SK11   | 76           | CP000425      |
| CHPC577_16        | 254          | 29.12                | 6.81        | capsid and scaffold protein        | <i>L. lactis</i> subsp. cremoris SK11   | 94           | CP000425      |
| <b>CHPC577_17</b> | <b>902</b>   | <b>99.82</b>         | <b>5.34</b> | <b>hypothetical protein</b>        | <i>L. lactis</i> phage ul36             | 72           | AF349457      |
| <b>CHPC577_18</b> | <b>648</b>   | <b>71.70</b>         | <b>5.58</b> | <b>upper baseplate protein</b>     | <i>L. lactis</i> subsp. cremoris SK11   | 90           | CP000425      |
| CHPC577_19        | 176          | 19.59                | 9.88        | serine acetyltransferase           | <i>Lactobacillus helveticus</i> R0052   | 65           | CP003799      |
| CHPC577_20        | 75           | 8.67                 | 6.84        | holin                              | <i>L. lactis</i> subsp. cremoris SK11   | 100          | CP000425      |
| CHPC577_21        | 81           | 8.77                 | 7.54        | holin                              | <i>S. thermophilus</i> phage 858        | 91           | EF529515      |
| <b>CHPC577_22</b> | <b>201</b>   | <b>21.99</b>         | <b>4.48</b> | <b>lysine</b>                      | <i>S. thermophilus</i> phage 7201       | 93           | AF145054      |
| CHPC577_23        | 254          | 29.98                | 10.31       | endonuclease                       | <i>S. thermophilus</i> phage S92        | 100          | AF148563      |
| CHPC577_24        | 76           | 8.65                 | 3.68        | lysine                             | <i>S. thermophilus</i> phage DT1        | 97           | AF085222      |
| CHPC577_25        | 112          | 12.25                | 10.29       | hypothetical protein               | <i>S. thermophilus</i> phage DT1        | 86           | AF085222      |
| CHPC577_26        | 93           | 10.60                | 10.05       | hypothetical protein               | <i>S. thermophilus</i> phage SK778      | 74           | HG917970      |

|                    |            |              |             |                                                 |                                           |     |          |
|--------------------|------------|--------------|-------------|-------------------------------------------------|-------------------------------------------|-----|----------|
| CHPC577_27         | 184        | 21.40        | 8.33        | hypothetical protein                            | <i>S. thermophilus</i> phage DT1          | 90  | AF085222 |
| <b>CHPC577_28*</b> | <b>227</b> | <b>24.71</b> | <b>9.91</b> | <b>hypothetical protein</b>                     | <i>S. macedonicus</i> ACA-DC 198          | 45  | HE613569 |
| CHPC577_29         | 70         | 8.07         | 7.55        | hypothetical protein                            | <i>S. thermophilus</i> phage<br>phiBHN167 | 90  | HF563658 |
| CHPC577_30         | 47         | 5.41         | 10.63       | hypothetical protein                            | <i>S. thermophilus</i> phage Abc2         | 88  | FJ236310 |
| CHPC577_31         | 43         | 4.98         | 6.49        | hypothetical protein                            | <i>Streptococcus</i> sp. HTS5             | 59  | CP015196 |
| CHPC577_32         | 105        | 12.27        | 4.40        | hypothetical protein                            | <i>S. thermophilus</i> phage DT1          | 100 | AF085222 |
| CHPC577_33         | 184        | 21.24        | 10.47       | endonuclease                                    | <i>Staphylococcus</i> phage StB20         | 64  | JN700521 |
| CHPC577_34         | 234        | 26.44        | 4.67        | DNA-binding protein                             | <i>S. thermophilus</i> phage DT1          | 100 | AF085222 |
| CHPC577_35         | 444        | 50.43        | 8.06        | DNA helicase                                    | <i>S. thermophilus</i> phage ALQ13.2      | 99  | FJ226752 |
| <b>CHPC577_36</b>  | <b>152</b> | <b>17.29</b> | <b>4.74</b> | <b>single-stranded DNA-<br/>binding protein</b> | <i>S. thermophilus</i> phage Sfi21        | 100 | AF004379 |
| CHPC577_37         | 270        | 30.14        | 7.26        | replication protein                             | <i>S. thermophilus</i> phage Sfi21        | 99  | AF004379 |
| CHPC577_38         | 504        | 58.80        | 7.07        | DNA primase/helicase                            | <i>S. thermophilus</i> phage SFi18        | 98  | X77469   |
| CHPC577_39         | 107        | 12.12        | 10.25       | hypothetical protein                            | <i>S. thermophilus</i> phage 2972         | 93  | AY699705 |
| CHPC577_40         | 39         | 4.37         | 4.33        | hypothetical protein                            | <i>S. thermophilus</i> phage TP-J34       | 79  | HE861935 |
| CHPC577_41         | 58         | 6.37         | 10.19       | hypothetical protein                            | <i>S. thermophilus</i> phage O1205        | 97  | U88974   |
| CHPC577_42         | 55         | 6.65         | 6.52        | hypothetical protein                            | <i>S. thermophilus</i> phage 2972         | 90  | AY699705 |
| CHPC577_43         | 63         | 7.17         | 9.45        | adenine-specific<br>methyltransferase           | <i>S. thermophilus</i> phage 7201         | 97  | AF145054 |
| CHPC577_44         | 157        | 17.82        | 9.74        | adenine-specific<br>methyltransferase           | <i>S. thermophilus</i> phage 7201         | 94  | AF145054 |
| CHPC577_45         | 163        | 19.52        | 4.46        | hypothetical protein                            | <i>S. thermophilus</i> phage 5093         | 68  | FJ965538 |
| CHPC577_46         | 171        | 19.67        | 7.60        | DNA-binding protein                             | <i>S. thermophilus</i> phage 2972         | 95  | AY699705 |
| CHPC577_47         | 272        | 31.83        | 6.30        | methylase                                       | <i>Streptococcus</i> phage phiNJ2         | 72  | JX879087 |
| CHPC577_48         | 41         | 4.40         | 6.45        | hypothetical protein                            | <i>S. thermophilus</i> phage Abc2         | 95  | FJ236310 |
| CHPC577_49         | 236        | 27.79        | 9.60        | hypothetical protein                            | <i>S. thermophilus</i> phage 858          | 87  | EF529515 |
| CHPC577_50         | 133        | 15.71        | 9.54        | hypothetical protein                            | <i>S. thermophilus</i> phage ALQ13.2      | 82  | FJ226752 |

12 Proteins identified in the LCMS are written in bold; ORFs marked in dark grey – part of the core  
13 genome of the subgroup II of *L. lactis* P335 phages; ORFs marked in light grey - part of the core  
14 genome of known *S. thermophilus* phages; \* indicates ORF located on the opposite strand.

15

16 TABLE S3 Features and putative functions of ORFs annotated for phage CHPC926.

| ORF        | Size<br>[aa] | Mol<br>mass<br>[kDa] | pI    | Putative function                   | Highest identity                      | Identity [%] | Accession no. |
|------------|--------------|----------------------|-------|-------------------------------------|---------------------------------------|--------------|---------------|
|            |              |                      |       | RASTtk                              | tBLASTn                               | tBLASTn      | tBLASTn       |
| CHPC926_01 | 65           | 7.73                 | 5.64  | terminase, small subunit            | <i>L. lactis</i> phage Tuc2009        | 98           | AF109874      |
| CHPC926_02 | 378          | 43.19                | 6.39  | terminase, large subunit            | <i>L. lactis</i> phage TP901-1        | 99           | AF304433      |
| CHPC926_03 | 447          | 51.57                | 4.39  | <b>portal protein</b>               | <i>L. lactis</i> phage ul36.k1        | 93           | DQ394806      |
| CHPC926_04 | 348          | 39.79                | 7.93  | <b>minor capsid protein</b>         | <i>L. lactis</i> phage Tuc2009        | 94           | AF109874      |
| CHPC926_05 | 200          | 22.21                | 4.64  | capsid and scaffold<br>protein      | <i>L. lactis</i> phage TP901-1        | 96           | X84706        |
| CHPC926_06 | 288          | 31.33                | 5.83  | <b>major capsid protein</b>         | <i>L. lactis</i> phage ul36           | 93           | AF349457      |
| CHPC926_07 | 64           | 6.35                 | 4.71  | <b>major tail protein</b>           | <i>L. lactis</i> phage ul36           | 98           | AF349457      |
| CHPC926_08 | 111          | 12.89                | 4.61  | <b>hypothetical protein</b>         | <i>L. lactis</i> subsp. cremoris SK11 | 99           | CP000425      |
| CHPC926_09 | 104          | 12.18                | 4.56  | <b>hypothetical protein</b>         | <i>L. lactis</i> phage ul36           | 96           | AF349457      |
| CHPC926_10 | 109          | 11.98                | 10.34 | capsid and scaffold<br>protein      | <i>L. lactis</i> phage Tuc2009        | 96           | AF109874      |
| CHPC926_11 | 130          | 14.79                | 6.53  | capsid and scaffold<br>protein      | <i>L. lactis</i> phage Tuc2009        | 95           | AF109874      |
| CHPC926_12 | 166          | 18.26                | 4.57  | <b>tail protein</b>                 | <i>L. lactis</i> phage ul36           | 98           | AF349457      |
| CHPC926_13 | 117          | 13.34                | 4.82  | hypothetical protein                | <i>L. lactis</i> phage ul36           | 97           | AF349457      |
| CHPC926_14 | 90           | 10.73                | 10.27 | hypothetical protein                | <i>L. lactis</i> phage P335           | 100          | DQ838728      |
| CHPC926_15 | 738          | 78.70                | 9.73  | <b>tape-measure protein</b>         | <i>L. lactis</i> phage ul36.k1        | 96           | DQ394806      |
| CHPC926_16 | 254          | 29.17                | 5.83  | capsid and scaffold<br>protein      | <i>L. lactis</i> subsp. cremoris SK11 | 94           | CP000425      |
| CHPC926_17 | 911          | 100.96               | 5.74  | <b>hypothetical protein</b>         | <i>L. lactis</i> phage P335           | 72           | DQ838728      |
| CHPC926_18 | 648          | 71.59                | 5.59  | <b>upper baseplate protein</b>      | <i>L. lactis</i> phage Tuc2009        | 90           | AF109874      |
| CHPC926_19 | 139          | 15.63                | 9.57  | transcription termination<br>factor | <i>S. salivarius</i> JIM8777          | 74           | FR873482      |
| CHPC926_20 | 81           | 8.76                 | 9.84  | holin                               | <i>S. thermophilus</i> phage TP-778L  | 88           | HG380752      |
| CHPC926_21 | 201          | 21.79                | 4.45  | lysin                               | <i>S. thermophilus</i> phage S92      | 94           | AF148563      |
| CHPC926_22 | 55           | 6.12                 | 10.31 | endonuclease                        | <i>S. thermophilus</i> phage S92      | 100          | AF148563      |
| CHPC926_23 | 76           | 8.61                 | 3.72  | lysin                               | <i>S. thermophilus</i> phage ST64     | 100          | AF148562      |
| CHPC926_24 | 68           | 7.59                 | 9.20  | cro-like protein                    | <i>S. thermophilus</i> phage SK778    | 100          | HG917969      |
| CHPC926_25 | 315          | 36.41                | 4.99  | hypothetical protein                | <i>S. thermophilus</i> phage ALQ13.2  | 97           | FJ226752      |

|                   |            |              |             |                                     |                                           |           |                 |
|-------------------|------------|--------------|-------------|-------------------------------------|-------------------------------------------|-----------|-----------------|
| CHPC926_26        | 181        | 20.99        | 9.89        | antirepressor protein               | <i>S. thermophilus</i> phage 5093         | 95        | FJ965538        |
| CHPC926_27        | 70         | 8.23         | 9.42        | transcription regulator             | <i>S. thermophilus</i> phage ALQ13.2      | 100       | FJ226752        |
| CHPC926_28        | 47         | 5.48         | 10.41       | hypothetical protein                | <i>S. thermophilus</i> phage DT1          | 86        | AF085222        |
| CHPC926_29        | 288        | 33.37        | 4.69        | replication initiation protein      | <i>S. thermophilus</i> phage Abc2         | 94        | FJ236310        |
| CHPC926_30        | 261        | 30.53        | 9.12        | DNA helicase loader                 | <i>S. thermophilus</i> phage 7201         | 94        | AF145054        |
| CHPC926_31        | 66         | 7.86         | 5.53        | hypothetical protein                | <i>S. thermophilus</i> phage Abc2         | 77        | FJ236310        |
| CHPC926_32        | 276        | 30.79        | 4.37        | recombinase                         | <i>Streptococcus</i> phage phi30c         | 62        | KC348599        |
| CHPC926_33        | 279        | 32.53        | 6.41        | hypothetical protein                | <i>Streptococcus</i> phage phi5218        | 62        | KC348600        |
| CHPC926_34        | 149        | 16.59        | 5.92        | single-stranded DNA-binding protein | <i>S. thermophilus</i> phage Abc2         | 90        | FJ236310        |
| CHPC926_35        | 154        | 18.10        | 10.03       | holliday junction resolvase         | <i>S. thermophilus</i> phage Abc2         | 93        | FJ236310        |
| CHPC926_36        | 79         | 9.09         | 9.59        | hypothetical protein                | <i>S. thermophilus</i> phage Abc2         | 89        | FJ236310        |
| CHPC926_37        | 58         | 6.52         | 8.48        | hypothetical protein                | <i>S. thermophilus</i> phage 858          | 91        | EF529515        |
| CHPC926_38        | 51         | 6.13         | 5.01        | hypothetical protein                | <i>S. thermophilus</i> phage DT1          | 93        | AF085222        |
| CHPC926_39        | 128        | 14.36        | 8.98        | hypothetical protein                | <i>S. thermophilus</i> phage Abc2         | 94        | FJ236310        |
| <b>CHPC926_40</b> | <b>117</b> | <b>13.25</b> | <b>4.67</b> | <b>DNA-binding protein</b>          | <b><i>S. thermophilus</i> phage 5093</b>  | <b>93</b> | <b>FJ965538</b> |
| CHPC926_41        | 51         | 5.54         | 9.54        | hypothetical protein                | <i>Streptococcus</i> phage 20617          | 94        | HG424323        |
| <b>CHPC926_42</b> | <b>236</b> | <b>27.70</b> | <b>9.90</b> | <b>hypothetical protein</b>         | <b><i>S. thermophilus</i> phage Sfi11</b> | <b>90</b> | <b>AF158600</b> |
| CHPC926_43        | 150        | 17.33        | 7.90        | hypothetical protein                | <i>S. pseudopneumoniae</i> IS7493         | 51        | CP002925        |
| CHPC926_44        | 161        | 18.57        | 9.42        | hypothetical protein                | <i>L. lactis</i> phage P335               | 92        | DQ838728        |

- 17 Proteins identified in the LCMS are written in bold; ORFs marked in dark grey – part of the core
- 18 genome of the subgroup II of *L. lactis* P335 phages; ORFs marked in light grey - part of the core
- 19 genome of known *S. thermophilus* phages.

20 TABLE S4 Features and putative functions of ORFs annotated for phage CHPC1151.

| ORF                | Size<br>[aa] | Mol<br>mass<br>[kDa] | pI           | Putative function<br>RASTtk    | Highest identity                         | Identity [%] | Accession no. |
|--------------------|--------------|----------------------|--------------|--------------------------------|------------------------------------------|--------------|---------------|
|                    |              |                      |              |                                | tBLASTn                                  | tBLASTn      | tBLASTn       |
| CHPC1151_01        | 139          | 16.24                | 9.02         | hypothetical protein           | <i>S. thermophilus</i> phage 5093        | 99           | FJ965538      |
| CHPC1151_02        | 149          | 16.94                | 6.05         | terminase, small subunit       | <i>S. thermophilus</i> phage 5093        | 100          | FJ965538      |
| CHPC1151_03        | 435          | 50.53                | 6.52         | terminase, large subunit       | <i>S. thermophilus</i> phage 5093        | 100          | FJ965538      |
| <b>CHPC1151_04</b> | <b>487</b>   | <b>55.13</b>         | <b>4.48</b>  | <b>minor capsid protein</b>    | <i>S. thermophilus</i> phage 5093        | 99           | FJ965538      |
| <b>CHPC1151_05</b> | <b>408</b>   | <b>46.96</b>         | <b>8.95</b>  | <b>minor capsid protein</b>    | <i>S. thermophilus</i> phage 5093        | 100          | FJ965538      |
| CHPC1151_06        | 206          | 22.94                | 4.65         | capsid and scaffold<br>protein | <i>S. thermophilus</i> phage 5093        | 100          | FJ965538      |
| <b>CHPC1151_07</b> | <b>282</b>   | <b>30.10</b>         | <b>4.63</b>  | <b>major capsid protein</b>    | <i>S. thermophilus</i> phage 5093        | 100          | FJ965538      |
| CHPC1151_08        | 62           | 6.82                 | 7.54         | transcription terminator       | <i>S. thermophilus</i> phage 5093        | 100          | FJ965538      |
| CHPC1151_09        | 130          | 14.73                | 4.93         | hypothetical protein           | <i>S. thermophilus</i> phage 5093        | 99           | FJ965538      |
| <b>CHPC1151_10</b> | <b>112</b>   | <b>12.96</b>         | <b>8.65</b>  | <b>minor capsid protein</b>    | <i>S. thermophilus</i> phage 5093        | 100          | FJ965538      |
| <b>CHPC1151_11</b> | <b>120</b>   | <b>13.19</b>         | <b>10.61</b> | <b>minor capsid protein</b>    | <i>S. thermophilus</i> phage 5093        | 99           | FJ965538      |
| CHPC1151_12        | 135          | 15.16                | 4.00         | minor capsid protein           | <i>S. thermophilus</i> phage 5093        | 100          | FJ965538      |
| <b>CHPC1151_13</b> | <b>168</b>   | <b>18.62</b>         | <b>4.59</b>  | <b>major tail protein</b>      | <i>S. thermophilus</i> phage 5093        | 98           | FJ965538      |
| CHPC1151_14        | 121          | 13.41                | 4.33         | hypothetical protein           | <i>S. thermophilus</i> phage 5093        | 100          | FJ965538      |
| CHPC1151_15        | 220          | 25.74                | 4.52         | hypothetical protein           | <i>S. thermophilus</i> phage 5093        | 100          | FJ965538      |
| <b>CHPC1151_16</b> | <b>1529</b>  | <b>154.90</b>        | <b>10.21</b> | <b>tape-measure protein</b>    | <i>S. thermophilus</i> phage 5093        | 99           | FJ965538      |
| CHPC1151_17        | 240          | 27.99                | 4.93         | hypothetical protein           | <i>S. thermophilus</i> phage 5093        | 99           | FJ965538      |
| <b>CHPC1151_18</b> | <b>509</b>   | <b>58.10</b>         | <b>6.91</b>  | <b>tape-measure protein</b>    | <i>S. thermophilus</i> phage 5093        | 99           | FJ965538      |
| <b>CHPC1151_19</b> | <b>819</b>   | <b>91.69</b>         | <b>6.12</b>  | <b>hypothetical protein</b>    | <i>S. thermophilus</i> phage 5093        | 100          | FJ965538      |
| CHPC1151_20        | 92           | 10.82                | 7.55         | holin                          | <i>S. thermophilus</i> phage 5093        | 98           | FJ965538      |
| CHPC1151_21        | 81           | 8.85                 | 9.16         | holin                          | <i>S. thermophilus</i> phage<br>ALQ13.2  | 89           | FJ226752      |
| CHPC1151_22        | 201          | 21.86                | 4.60         | lysin                          | <i>S. thermophilus</i> phage 7201        | 95           | AF145054      |
| CHPC1151_23        | 62           | 6.91                 | 10.19        | endonuclease                   | <i>S. thermophilus</i> phage S92         | 95           | AF148563      |
| CHPC1151_24        | 76           | 8.67                 | 3.87         | lysin                          | <i>S. thermophilus</i> phage 2972        | 100          | AY699705      |
| CHPC1151_25        | 68           | 7.64                 | 10.27        | cro-like protein               | <i>S. thermophilus</i> phage<br>DSM20617 | 85           | HG917971      |
| CHPC1151_26        | 225          | 26.02                | 7.49         | hypothetical protein           | <i>S. thermophilus</i> phage<br>ALQ13.2  | 92           | FJ226752      |

|             |     |       |       |                                         |                                           |     |          |
|-------------|-----|-------|-------|-----------------------------------------|-------------------------------------------|-----|----------|
| CHPC1151_27 | 70  | 8.07  | 7.55  | hypothetical protein                    | <i>S. thermophilus</i> phage<br>phiBHN167 | 90  | HF563658 |
| CHPC1151_28 | 249 | 28.83 | 9.79  | antirepressor                           | <i>S. agalactiae</i> ILRI005              | 70  | HF952105 |
| CHPC1151_29 | 64  | 7.84  | 10.59 | hypothetical protein                    | <i>S. thermophilus</i> phage 20617        | 72  | HG424323 |
| CHPC1151_30 | 292 | 33.83 | 6.19  | replication initiation<br>protein       | <i>S. thermophilus</i> phage 5093         | 100 | FJ965538 |
| CHPC1151_31 | 261 | 30.44 | 8.69  | DNA helicase loader                     | <i>S. thermophilus</i> phage 7201         | 97  | AF145054 |
| CHPC1151_32 | 61  | 7.22  | 4.50  | hypothetical protein                    | <i>S. thermophilus</i> phage 5093         | 81  | FJ965538 |
| CHPC1151_33 | 308 | 35.22 | 4.89  | phenylalanyl-tRNA<br>synthetase         | <i>S. thermophilus</i> phage K13          | 84  | HG799496 |
| CHPC1151_34 | 324 | 37.67 | 4.65  | hypothetical protein                    | <i>S. thermophilus</i> phage 5093         | 82  | FJ965538 |
| CHPC1151_35 | 152 | 16.73 | 5.21  | single-stranded DNA-<br>binding protein | <i>S. thermophilus</i> phage Abc2         | 82  | FJ236310 |
| CHPC1151_36 | 154 | 18.06 | 9.88  | holliday junction<br>resolvase          | <i>S. thermophilus</i> phage 20617        | 94  | HG424323 |
| CHPC1151_37 | 91  | 10.55 | 8.71  | hypothetical protein                    | <i>S. thermophilus</i> phage TP-778L      | 88  | HG380752 |
| CHPC1151_38 | 57  | 6.38  | 9.11  | hypothetical protein                    | <i>S. thermophilus</i> phage TP-J34       | 86  | HE861935 |
| CHPC1151_39 | 53  | 6.54  | 5.69  | hypothetical protein                    | <i>S. thermophilus</i> phage 5093         | 96  | FJ965538 |
| CHPC1151_40 | 56  | 6.71  | 4.41  | hypothetical protein                    | unknown                                   | -   | -        |
| CHPC1151_41 | 38  | 4.45  | 4.37  | hypothetical protein                    | <i>S. thermophilus</i> phage 20617        | 81  | HG424323 |
| CHPC1151_42 | 194 | 23.15 | 4.50  | hypothetical protein                    | <i>S. thermophilus</i> phage 5093         | 76  | FJ965538 |
| CHPC1151_43 | 171 | 19.70 | 5.41  | DNA-binding protein                     | <i>S. thermophilus</i> phage 5093         | 94  | FJ965538 |
| CHPC1151_44 | 288 | 31.93 | 8.05  | DNA-cytosine<br>methyltransferase       | <i>S. agalactiae</i> 2603V/R              | 87  | AE009948 |
| CHPC1151_45 | 53  | 5.67  | 8.46  | hypothetical protein                    | <i>S. thermophilus</i> phage Abc2         | 92  | FJ236310 |
| CHPC1151_46 | 236 | 27.74 | 9.53  | hypothetical protein                    | <i>S. thermophilus</i> phage 7201         | 91  | AF145054 |

21 Proteins identified in the LCMS are written in bold; ORFs marked in dark grey – the core  
22 genome of *S. thermophilus* phages 5093 and CHPC1151; ORFs marked in light grey – part of the  
23 core genome of known *S. thermophilus* phages.

24
